# Supplementary material for: Responses of CO2 and CH4 in the alpine wetlands of the Tibetan Plateau to warming and nitrogen and phosphorus additions
Source: Royal Society of Chemistry journal article supplement (doi:10.1039/d4em00174e), 2024-01-01
Supplement: d4em00174e1.pdf [file d4em00174e1.pdf]

Table 1 SOC content of soil (0-10 cm), (10-20 cm) under different treatments (mean ± standard error, n = 3)

|    | depth   | CK (g/kg)    | P3(g/kg)     | P2(g/kg)     | P1(g/kg)     | N3(g/kg)     | N2(g/kg)     | N1(g/kg)     | N2P2 (g/kg) |
|----|---------|--------------|--------------|--------------|--------------|--------------|--------------|--------------|-------------|
| NW | 0~10cm  | 90.00±5.63   | 93.30±3.02   | 95.93±11.93  | 129.6±52.19  | 83.50±8.05   | 97.10±8.43   | 92.47±2.80   | 89.50±5.72  |
|    | 10~20cm | 88.23±5.59   | 71.30±3.26   | 84.10±3.99   | 103.10±2.32  | 98.50±15.46  | 77.10±7.07   | 76.50±7.88   | 60.70±9.38  |
| W1 | 0~10cm  | 133±18.62    | 92.87±10.70  | 88.00±5.73   | 90±10.34     | 80.20±13.08  | 88.20±14.22  | 61.40±4.53   | 93.30±13.60 |
|    | 10~20cm | 90.00±7.30   | 83.00±4.97   | 78.43±9.64   | 83.00±5.02   | 64.80±11.95  | 75.20±17.65  | 86.60±11.39  | 76.50±4.28  |
| W2 | 0~10cm  | 113.70±13.38 | 108.73±11.35 | 108.60±3.24  | 103.80±11.67 | 95.40±10.08  | 122±15.52    | 111.37±18.79 | 93.60±12.83 |
|    | 10~20cm | 80.20±11.90  | 92.40±8.84   | 90.40±12.50  | 89.70±9.77   | 79.20±17.57  | 71.80±14.50  | 108.70±1.84  | 73.60±6.72  |
| W3 | 0~10cm  | 104.10±2.40  | 91.50±12.36  | 110.07±12.14 | 101.80±8.73  | 122.50±15.04 | 125.63±15.14 | 125.53±16.46 | 112.50±6.09 |
|    | 10~20cm | 93.10±11.96  | 85.10±13.86  | 109.13±10.16 | 76.50±22.20  | 106.05±12.55 | 82.00±18.99  | 113.00±4.03  | 87.40±14.43 |

Table 2 NO<sub>3</sub><sup>-</sup>-N content of soil (0-10 cm), (10-20 cm) under different treatments (mean ± standard error, n = 3)

|    | depth   | CK(mg/kg) | P3(mg/kg) | P2(mg/kg) | P1(mg/kg) | N3(mg/kg) | N2(mg/kg)  | N1(mg/kg) | N2P2(mg/kg) |
|----|---------|-----------|-----------|-----------|-----------|-----------|------------|-----------|-------------|
| NW | 0~10cm  | 2.80±0.29 | 4.49±0.46 | 4.76±1.17 | 2.89±0.19 | 5.31±0.21 | 4.69±0.27  | 6.05±2.66 | 3.33±0.89   |
|    | 10~20cm | 3.30±0.50 | 4.81±0.50 | 3.26±0.70 | 3.67±1.13 | 5.22±1.16 | 3.57±1.66  | 4.59±1.31 | 3.79±0.77   |
| W1 | 0~10cm  | 2.93±0.82 | 2.51±0.13 | 3.80±0.26 | 3.17±0.54 | 9.20±1.86 | 10.76±0.10 | 6.00±0.70 | 5.98±1.93   |
|    | 10~20cm | 4.66±1.77 | 1.78±0.56 | 3.60±1.04 | 7.13±0.83 | 4.60±0.09 | 6.07±1.51  | 2.70±0.28 | 4.15±1.15   |
| W2 | 0~10cm  | 4.39±1.97 | 1.95±1.14 | 2.22±0.55 | 2.12±0.33 | 2.43±0.33 | 2.61±0.77  | 4.17±0.51 | 3.66±1.07   |
|    | 10~20cm | 4.36±0.41 | 3.55±1.35 | 3.97±1.72 | 2.42±0.85 | 4.32±1.51 | 5.88±0.86  | 4.78±0.60 | 3.32±0.62   |
| W3 | 0~10cm  | 2.28±0.82 | 2.17±0.76 | 0.95±0.09 | 2.42±0.72 | 3.88±0.55 | 2.34±0.26  | 3.06±0.39 | 2.71±0.73   |
|    | 10~20cm | 2.38±0.81 | 2.33±1.33 | 0.98±0.12 | 4.67±1.24 | 5.95±0.01 | 3.33±0.76  | 3.49±0.88 | 2.64±1.23   |

Table 3 NH<sub>4</sub><sup>+</sup>-N content of soil (0-10 cm), (10-20 cm) under different treatments (mean ± standard error, n = 3)

|    | depth   | CK(mg/kg)  | P3(mg/kg)  | P2(mg/kg)  | P1(mg/kg)  | N3(mg/kg)  | N2(mg/kg)  | N1(mg/kg)  | N2P2(mg/kg) |
|----|---------|------------|------------|------------|------------|------------|------------|------------|-------------|
| NW | 0~10cm  | 12.64±1.92 | 12.64±3.90 | 18.05±3.35 | 8.40±0.73  | 20.75±0.92 | 28.26±5.64 | 14.09±3.57 | 7.31±1.68   |
|    | 10~20cm | 7.78±3.55  | 12.70±2.38 | 18.37±2.40 | 10.20±3.09 | 21.26±3.90 | 10.83±2.19 | 10.93±2.15 | 5.37±1.24   |
| W1 | 0~10cm  | 13.47±3.17 | 13.50±2.71 | 7.63±1.83  | 10.29±3.48 | 15.44±2.13 | 21.06±1.70 | 19.21±1.81 | 17.94±2.64  |
|    | 10~20cm | 12.98±3.46 | 9.86±3.01  | 15.21±2.51 | 10.75±1.85 | 15.58±1.51 | 18.47±2.43 | 19.19±1.61 | 14.87±3.10  |
| W2 | 0~10cm  | 12.37±1.44 | 15.32±2.98 | 16.88±2.20 | 9.80±0.81  | 9.86±1.32  | 14.99±1.81 | 17.66±1.17 | 24.36±3.03  |
|    | 10~20cm | 11.72±1.20 | 9.24±1.12  | 7.71±0.57  | 7.12±1.35  | 13.95±0.56 | 18.27±3.92 | 21.98±1.05 | 8.96±1.07   |
| W3 | 0~10cm  | 5.45±1.28  | 5.17±0.51  | 8.53±1.28  | 9.77±1.25  | 25.09±4.86 | 19.73±1.29 | 13.54±1.15 | 12.09±2.36  |
|    | 10~20cm | 11.27±0.97 | 9.04±0.40  | 10.70±0.30 | 8.08±0.83  | 12.08±0.01 | 16.56±1.71 | 12.06±1.21 | 9.91±1.13   |
